# Supplementary material for: Paper-based inkjet bioprinting to detect fluorescence resonance energy transfer for the assessment of anti-inflammatory activity
Source: PubMed Central journal article supplement (PMC5766618; doi:10.1038/s41598-017-18995-3), 2018-01-12
Supplement: 41598_2017_18995_MOESM1_ESM.pdf [file 41598_2017_18995_MOESM1_ESM.pdf]

## Paper-based inkjet bioprinting to detect fluorescence resonance energy transfer for the assessment of anti-inflammatory activity

Annie Agnes Suganya Samson, Jungmi Lee and Joon Myong Song\*

College of Pharmacy, Seoul National University, Seoul 08826, South Korea

### Supplementary Tables

**Supplementary Table S1.** Illustration of the solution densities of different reaction components.

| S.No | Solution      | ds in g/mL |
|------|---------------|------------|
| 1    | Buffer        | 1.5296     |
| 2    | cAMP          | 1.6073     |
| 3    | PDE4B         | 1.5811     |
| 4    | Eu- anti cAMP | 1.5122     |
| 5    | Ulight cAMP   | 1.5174     |
| 6    | Roliparm      | 1.5602     |
| 7    | Roflumilast   | 1.6003     |

**Supplementary Table S2.** Representation of ejection volume and their respective mole printed on the surface.

| S.No | Reaction sample                  | Volume printed (nL) | Mole printed |
|------|----------------------------------|---------------------|--------------|
| 1    | cAMP (10 nM)                     | 27.8                | 2.79E-16     |
| 2    | PDE4B - High Conc. (10 $\mu$ M)  | 28.06               | 2.81E-13     |
| 3    | PDE4B - Medium Conc. (5 $\mu$ M) | 28.06               | 1.40E-13     |
| 4    | PDE4B - Low Conc. (0.5 $\mu$ M)  | 28.06               | 1.40E-14     |

**Supplementary Table S3.** Illustration of the number of mole of PDE4B inhibitors printed per spot area and their respective  $IM_{50}$  values.

| C value            | 0 | 2 - 8 | 12 - 18 | 22 - 28 | 32 - 38 | 42 - 48 | 52 - 58 | 62 - 68 | 72 - 78 | 82 - 88 | $IM_{50}$                   |
|--------------------|---|-------|---------|---------|---------|---------|---------|---------|---------|---------|-----------------------------|
| <b>Roliparm</b>    | 0 | 0.29  | 0.32    | 0.62    | 1       | 1.33    | 1.75    | 2.11    | 2.43    | 2.72    | $2.46 \times 10^{-13}$ mole |
| <b>Roflumilast</b> | 0 | 0.04  | 0.07    | 0.38    | 0.77    | 1.1     | 1.5     | 1.9     | 2.2     | 2.5     | $1.86 \times 10^{-13}$ mole |
